# Supplementary material for: Single-cell RNA-seq reveals RAD51AP1 as a potent mediator of EGFRvIII in human glioblastomas
Source: publisher site journal article supplement (doi:10.18632/aging.102282), 2019-09-18
Supplement: Supplementary file [file aging-v11i18-102282-supplementary-material-SD1.pdf]

SUPPLEMENTARY FIGURES

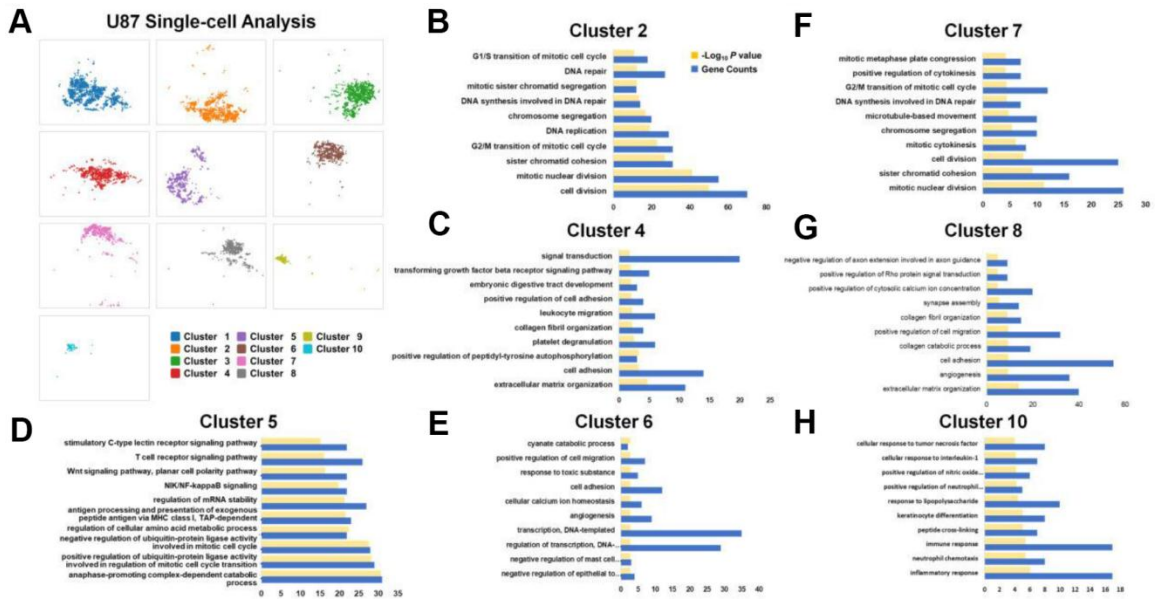

Supplementary Figure 1. Gene Ontology (GO) analysis of each subset using cluster-specific genes in U87MG cells.

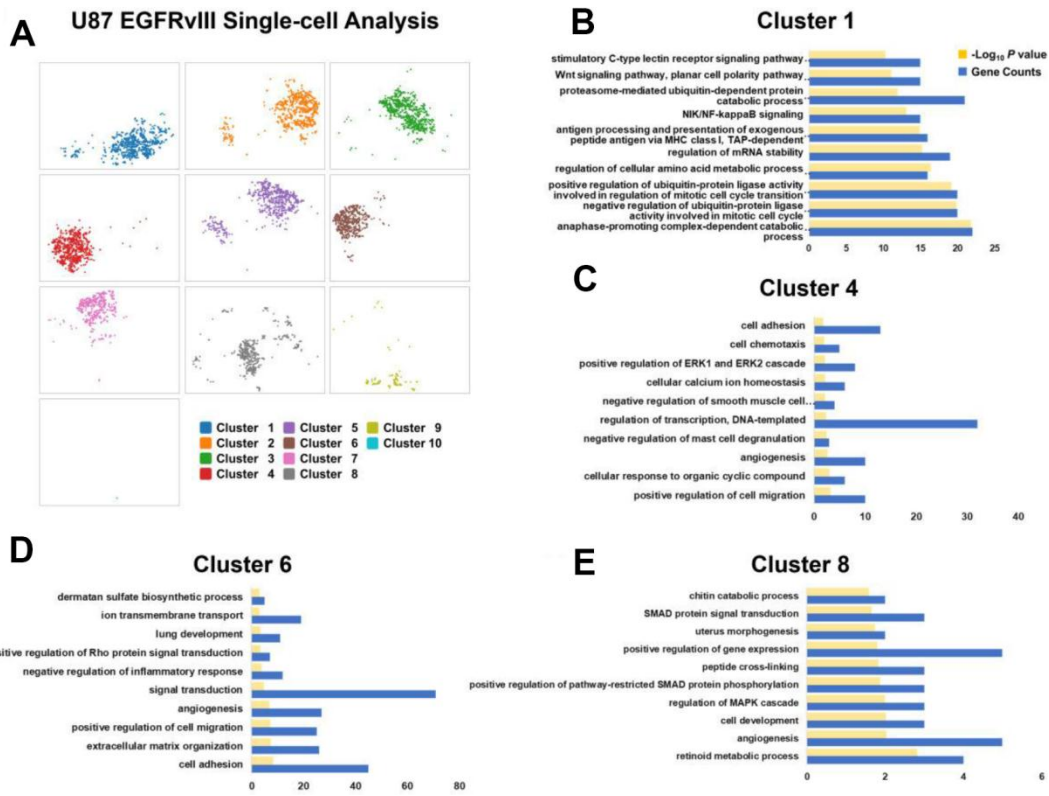

Supplementary Figure 2. Gene Ontology (GO) analysis of each subset using cluster-specific genes in U87MG-EGFRvIII cells.

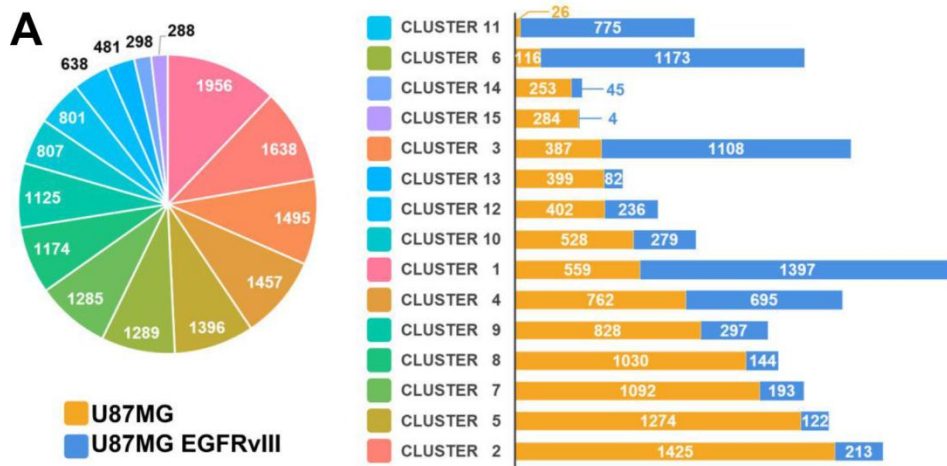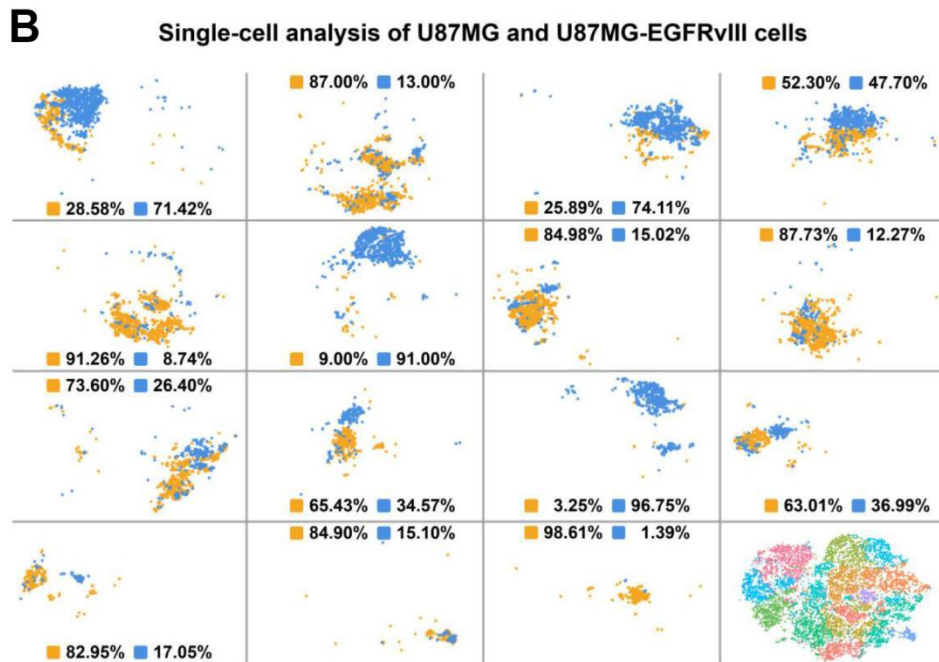

Supplementary Figure 3. The distributions and percentages of U87MG and U87MG-EGFRvIII cells in each cluster.

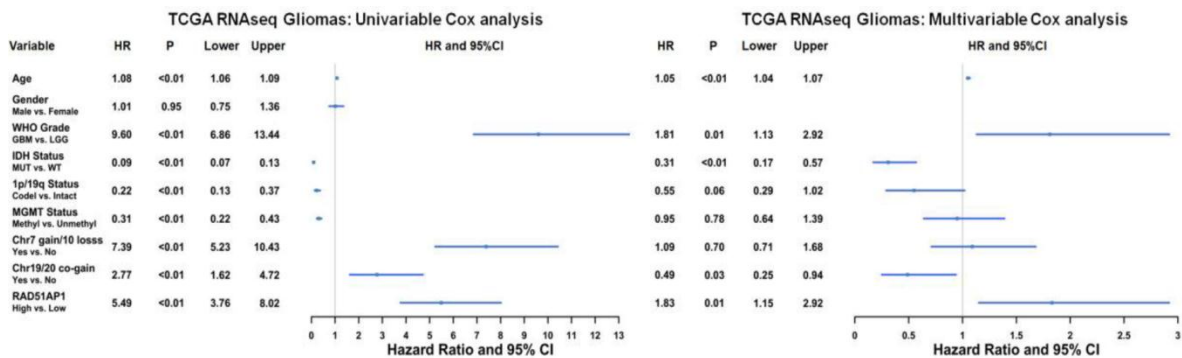

Supplementary Figure 4. Uni- and multivariable Cox analyses were performed to evaluate the role of RAD51AP1 in gliomas in the TCGA database.

**A The EGFRvIII positively associated biological processes (GSE46028)**

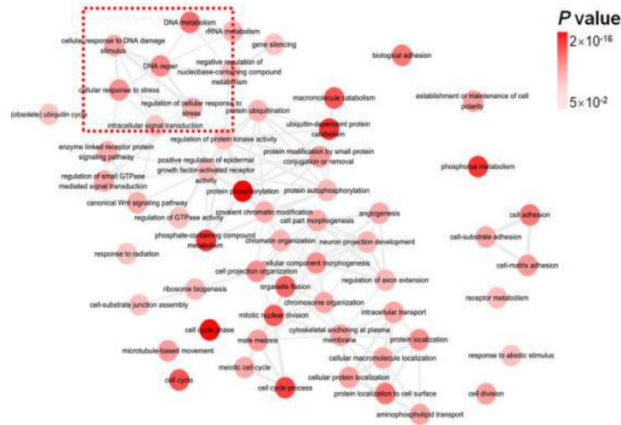

**B The EGFRvIII positively associated biological processes (U87 EGFRvIII vs. U87)**

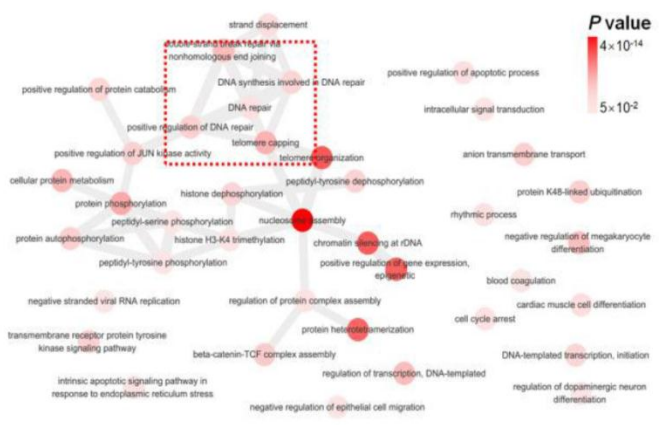

Supplementary Figure 5. GO and KEGG analyses were employed to profile the pathways of RAD51AP1-related genes in the CGGA database.
