# Supplementary material for: Single-cell RNA-seq reveals RAD51AP1 as a potent mediator of EGFRvIII in human glioblastomas
Source: Aging (Albany NY). 2019 Sep 18;11(18):7707–22. doi: 10.18632/aging.102282 (PMC6781999; doi:10.18632/aging.102282)
Supplement: Supplementary Table 1 [file aging-11-102282-s001.xlsx]

## Sheet: 10+Genes
EnsemblID	GeneName	Cluster 1 Average	Cluster 1 Log2 Fold Change	Cluster 1 P-Value	Cluster 2 Average	Cluster 2 Log2 Fold Change	Cluster 2 P-Value	Cluster 3 Average	Cluster 3 Log2 Fold Change	Cluster 3 P-Value	Cluster 4 Average	Cluster 4 Log2 Fold Change	Cluster 4 P-Value	Cluster 5 Average	Cluster 5 Log2 Fold Change	Cluster 5 P-Value	Cluster 6 Average	Cluster 6 Log2 Fold Change	Cluster 6 P-Value	Cluster 7 Average	Cluster 7 Log2 Fold Change	Cluster 7 P-Value	Cluster 8 Average	Cluster 8 Log2 Fold Change	Cluster 8 P-Value	Cluster 9 Average	Cluster 9 Log2 Fold Change	Cluster 9 P-Value	Cluster 10 Average	Cluster 10 Log2 Fold Change	Cluster 10 P-Value
ENSG00000170312	CDK1	0.196216	-2.93069	1.55059e-09	2.52351	1.36511	1.12702e-05	2.04915	0.789784	0.170875	1.05355	-0.351294	0.770745	1.47542	0.205646	0.832232	1.23774	-0.081825	1	0.277832	-2.3494	0.000214556	0.243551	-2.50259	0.00120237	0.31667	-2.0276	1	1.73565	0.167487	0.246603
ENSG00000131747	TOP2A	0.319829	-2.95192	1.55059e-09	2.2835	0.104793	0.869842	4.46168	1.32188	0.000488048	2.67622	0.365017	0.586204	2.59968	0.315169	0.713896	3.98464	0.96549	1	0.240378	-3.29712	1.97313e-07	0.536938	-2.08297	0.00817518	0.278052	-2.93621	1	0.578549	-1.55724	0.262369
ENSG00000134690	CDCA8	0.135527	-2.82289	4.63984e-09	1.15901	0.62173	0.117139	1.64336	1.21319	0.00203416	1.1071	0.472762	0.451737	0.902725	0.12292	0.928067	0.877076	0.0687118	1	0.131369	-2.79694	1.13155e-05	0.149507	-2.56648	0.000943558	0.177644	-2.19729	1	1.1571	0.390435	0.246603
ENSG00000123485	HJURP	0.109464	-2.83481	4.63984e-09	0.791147	0.273334	0.561359	1.3842	1.27964	0.000931564	0.979247	0.617891	0.258029	0.718867	0.0846498	0.967393	0.955403	0.520831	1	0.110127	-2.754	1.5875e-05	0.16719	-2.10377	0.00789544	0.162197	-2.02699	1	0.578549	0.100971	0.246603
ENSG00000145386	CCNA2	0.154888	-2.78129	6.06473e-09	1.51275	0.962258	0.0053216	1.73728	1.11587	0.00690421	0.957246	0.0449768	1	0.965253	0.0589221	0.998864	1.06925	0.212239	1	0.152053	-2.73745	1.5875e-05	0.154329	-2.67376	0.000522586	0.177644	-2.34909	1	0	-1.34629	1
ENSG00000143228	NUF2	0.0837735	-2.79502	6.52133e-09	1.02959	1.47418	1.6863e-06	0.684767	0.508776	0.630608	0.378581	-0.483812	0.618298	0.712242	0.57398	0.490982	0.404384	-0.351033	1	0.0995053	-2.47134	0.000110858	0.0602849	-3.15262	6.56557e-05	0.115855	-2.06327	1	0	-0.475891	1
ENSG00000152253	SPC25	0.180206	-2.7613	6.52133e-09	2.25474	1.58393	2.18032e-07	1.19874	0.19346	0.953071	0.612289	-0.895416	0.177518	1.77646	0.886969	0.159847	0.851575	-0.346905	1	0.186153	-2.64338	3.10054e-05	0.118158	-3.26073	2.97066e-05	0.463419	-1.19926	1	0.578549	-0.544673	0.248003
ENSG00000175063	UBE2C	1.47255	-2.73584	6.65185e-09	16.7145	1.38584	7.67358e-06	12.1839	0.608457	0.464808	6.44045	-0.467098	0.634691	12.4655	0.643972	0.415907	5.75428	-0.606481	1	1.68991	-2.46473	9.33026e-05	1.15024	-2.98724	0.000106572	2.39433	-1.85405	1	9.25679	-0.460372	0.246603
ENSG00000140451	PIF1	0.108347	-2.78501	1.35149e-08	0.643951	-0.0283231	1	1.75828	1.88653	2.57685e-08	1.01868	0.767994	0.111884	0.402085	-0.784146	0.486897	0.615684	-0.091952	1	0.120189	-2.56185	9.3148e-05	0.269273	-1.33855	0.129527	0.0772365	-2.96487	1	0	-0.835804	1
ENSG00000198692	EIF1AY	0.0938264	-2.73	1.35149e-08	0.507735	-0.131413	0.934594	0.0784628	-2.97943	9.27797e-09	1.55916	1.99636	1.07009e-10	0.617828	0.208008	0.832924	0.15301	-1.89362	0.898925	0.607653	0.172681	1	0.744318	0.486432	0.419838	0.563827	0.0550928	1	0	-0.575323	1
ENSG00000178999	AURKB	0.148186	-2.65347	1.95216e-08	1.52085	1.27192	6.89427e-05	1.27205	0.772993	0.194869	0.963473	0.276406	0.706903	0.766902	-0.106323	1	0.644829	-0.361712	1	0.152053	-2.54596	5.79857e-05	0.168798	-2.35283	0.00241105	0.208539	-1.93783	1	2.3142	1.16422	0.246603
ENSG00000142945	KIF2C	0.118772	-2.61946	3.90417e-08	0.805265	0.431638	0.3152	1.22529	1.16474	0.00402919	0.721878	0.199793	0.80724	0.813281	0.404399	0.625841	0.955403	0.622177	1	0.107891	-2.68992	2.64381e-05	0.131019	-2.36515	0.00248502	0.115855	-2.39452	1	0.578549	0.19346	0.246603
ENSG00000101447	FAM83D	0.0927094	-2.57871	7.07124e-08	0.673233	0.622153	0.120289	0.986333	1.27893	0.00096113	0.553343	0.214416	0.794194	0.47745	-0.0330134	1	0.574699	0.256006	1	0.107332	-2.29404	0.000403244	0.15031	-1.76182	0.0306934	0.0617892	-2.82936	1	6.36404	3.17589	0.246603
ENSG00000171320	ESCO2	0.055849	-2.40266	8.06175e-07	0.364722	0.642387	0.108096	0.473947	1.06253	0.0148863	0.281445	0.125138	0.910246	0.297734	0.220289	0.82292	0.421689	0.749891	1	0.0346591	-3.02365	4.32686e-06	0.0490317	-2.47613	0.0018869	0.0772365	-1.63984	1	1.1571	2.07297	0.246603
ENSG00000137807	KIF23	0.154143	-2.33247	9.56538e-07	0.947232	0.622043	0.117027	1.30217	1.15248	0.00454948	0.791202	0.241569	0.753802	0.71307	0.0660819	0.991305	0.912596	0.444112	1	0.122984	-2.59711	4.58013e-05	0.188089	-1.93592	0.0151661	0.108131	-2.58465	1	0	-0.903449	1
ENSG00000164104	HMGB2	1.28229	-2.29366	1.03078e-06	8.5481	0.849969	0.0182726	10.9238	1.22403	0.00159569	5.02741	-0.162308	0.996385	5.99235	0.129492	0.92042	6.46468	0.23584	1	1.02803	-2.55458	4.66457e-05	0.864887	-2.76746	0.000299898	1.26668	-2.14042	1	8.09969	-0.0122818	0.246603
ENSG00000136108	CKAP2	0.189514	-2.29525	1.26143e-06	1.17809	0.697677	0.0678068	1.45236	1.01283	0.0230433	0.921131	0.19188	0.816392	0.9872	0.310139	0.717075	0.904399	0.147898	1	0.197333	-2.17002	0.000794529	0.194519	-2.15287	0.00602027	0.115855	-2.75316	1	1.73565	0.835396	0.246603
ENSG00000129810	SGOL1	0.219673	-2.26242	1.52463e-06	1.39928	0.795077	0.0300958	1.63266	0.996705	0.026241	0.992115	0.105407	0.929109	1.07416	0.239903	0.795426	1.19767	0.389207	1	0.159879	-2.66365	2.64381e-05	0.152722	-2.68853	0.000480587	0.285775	-1.68449	1	2.89275	1.23952	0.246603
ENSG00000137804	NUSAP1	0.469876	-2.24395	1.58961e-06	3.19439	0.963555	0.00512365	3.32437	0.928124	0.0534794	1.7555	-0.187394	0.963958	2.48249	0.395371	0.633713	1.96272	-0.00345985	1	0.500321	-2.08701	0.00126728	0.327146	-2.67115	0.000496965	0.579274	-1.76248	1	3.4713	0.383873	0.246603
ENSG00000011426	ANLN	0.201429	-2.24391	1.83919e-06	0.909322	0.138291	0.812891	1.64653	1.20543	0.00214363	1.16729	0.555573	0.331561	0.933368	0.169396	0.872147	1.22681	0.582633	1	0.167146	-2.45317	0.000104174	0.292583	-1.59305	0.0516651	0.301222	-1.46725	1	0	-1.20314	1
ENSG00000168078	PBK	0.26249	-2.21755	2.08642e-06	1.74361	0.950187	0.00596954	1.5221	0.593861	0.494447	1.17767	0.145115	0.879076	1.30522	0.320305	0.711677	1.42627	0.431121	1	0.274478	-2.08729	0.00127494	0.180051	-2.66515	0.000521824	0.641063	-0.750392	1	0	-1.55912	1
ENSG00000111665	CDCA3	0.234566	-2.198	2.73585e-06	1.85472	1.3825	7.86256e-06	1.33862	0.588408	0.505556	0.902036	-0.0903903	1	0.990099	0.0643887	0.992839	0.613862	-0.665914	1	0.368393	-1.4631	0.0589554	0.163171	-2.62517	0.000654917	0.455696	-1.05613	1	0.578549	-0.378151	0.24775
ENSG00000087586	AURKA	0.551788	-2.19635	2.79711e-06	3.25976	0.731579	0.0522193	4.60078	1.31074	0.000557971	2.11499	-0.0929185	1	2.2593	0.0165172	1	2.77149	0.33097	1	0.4556	-2.41512	0.000135761	0.409134	-2.53334	0.00105473	0.378459	-2.55362	1	0.578549	-1.60947	0.263281
ENSG00000072571	HMMR	0.118772	-2.20871	3.083e-06	0.809187	1.01569	0.00312818	0.761248	0.784115	0.184383	0.572438	0.274532	0.712718	0.515133	0.0959789	0.956402	0.489997	0.012182	1	0.121866	-2.10535	0.00136691	0.0683229	-2.90509	0.000208193	0.108131	-2.08945	1	1.73565	1.59158	0.246603
ENSG00000138778	CENPE	0.139623	-2.19329	3.69799e-06	0.895988	0.907915	0.0107003	0.982371	0.978764	0.0353392	0.529682	-0.108857	1	0.609546	0.124906	0.926337	0.647561	0.208788	1	0.167146	-1.86257	0.00672693	0.155133	-1.93584	0.0159218	0.146749	-1.89185	1	1.1571	0.958506	0.246603
ENSG00000121211	MND1	0.181695	-2.1591	4.08671e-06	1.28398	1.17592	0.000327441	0.943535	0.466117	0.688777	0.496888	-0.599947	0.486591	1.1988	0.892774	0.157414	0.697654	-0.046366	1	0.14814	-2.39537	0.000156439	0.0779685	-3.28388	2.77028e-05	0.262604	-1.42961	1	0	-0.972942	1
ENSG00000075218	GTSE1	0.56333	-2.12041	5.45049e-06	3.03935	0.648904	0.0956613	4.38599	1.27483	0.000894208	2.14031	-0.0236009	1	2.44067	0.196773	0.838167	2.51647	0.22749	1	0.414233	-2.51088	6.37897e-05	0.405115	-2.50393	0.00112333	0.494314	-2.13126	1	1.73565	-0.566145	0.246603
ENSG00000024526	DEPDC1	0.236055	-2.12486	6.01807e-06	1.41915	0.867791	0.0157202	1.49674	0.870429	0.094709	1.17892	0.434547	0.502185	0.867113	-0.0854491	1	0.918972	0.0100934	1	0.261062	-1.91262	0.00452746	0.196127	-2.2953	0.00313268	0.386183	-1.22988	1	0.578549	-0.316859	0.247304
ENSG00000197061	HIST1H4C	10.0889	-2.09761	7.29259e-06	46.189	0.353447	0.428409	61.7229	0.83997	0.119536	34.4393	-0.174446	0.983441	65.4985	0.942106	0.119691	64.0521	0.806091	1	7.1409	-2.54561	5.31512e-05	7.13452	-2.50811	0.0011275	5.76185	-2.74933	1	1.73565	-4.70613	0.314817
ENSG00000088325	TPX2	0.710772	-2.06678	9.41045e-06	3.1808	0.348324	0.434215	5.20946	1.22569	0.00157602	3.15318	0.298109	0.673754	2.83365	0.11672	0.93434	4.083	0.678577	1	0.527154	-2.44595	9.6331e-05	0.561052	-2.31603	0.00264583	0.687405	-1.94513	1	2.89275	-0.264831	0.246603
ENSG00000166851	PLK1	0.296744	-2.03724	1.58444e-05	1.72269	0.918867	0.00889418	1.86211	0.961235	0.0403992	1.26152	0.257913	0.734655	0.970222	-0.180609	0.983471	1.09657	0.0198967	1	0.331498	-1.81117	0.00843166	0.251589	-2.18103	0.0052543	0.278052	-1.94005	1	0	-1.56244	1
ENSG00000204103	MAFB	0.883532	1.47005	1.58444e-05	0.166282	-1.48436	0.000353637	0.364575	-0.164112	1	0.0921546	-2.28263	3.22887e-06	0.206219	-1.0673	0.251051	0.606576	0.640031	1	0.649579	0.790839	0.287103	0.63259	0.714569	0.219205	0.216262	-0.861921	1	1.73565	1.86486	0.246603
ENSG00000198901	PRC1	0.582319	-2.01779	1.65194e-05	3.05975	0.735385	0.0490509	3.32516	0.809633	0.145444	2.41055	0.235355	0.760819	2.66759	0.409732	0.61585	2.20863	0.0801644	1	0.562372	-2.00829	0.0020586	0.402703	-2.46124	0.00136666	1.0118	-1.05587	1	1.1571	-0.930487	0.246603
ENSG00000164109	MAD2L1	0.38238	-1.97544	2.63856e-05	2.67568	1.44813	1.89918e-06	1.35368	0.0190595	1	1.04276	-0.408024	0.698396	1.88371	0.586294	0.477176	1.00914	-0.429963	1	0.515974	-1.46821	0.0555398	0.27088	-2.38395	0.00197465	1.09676	-0.289972	1	1.1571	-0.283514	0.246603
ENSG00000138182	KIF20B	0.198823	-1.99176	2.63856e-05	1.10044	0.879864	0.0140272	1.19359	0.933657	0.0524188	0.683273	-0.0494274	1	0.751581	0.109526	0.941655	0.840645	0.274258	1	0.202924	-1.89986	0.00500092	0.17764	-2.05875	0.00913608	0.262604	-1.39854	1	0	-0.941953	1
ENSG00000117724	CENPF	0.782259	-1.96185	3.06567e-05	3.77298	0.635637	0.105997	4.87936	1.04668	0.0150656	2.75094	0.0234183	1	3.29826	0.330752	0.699003	3.61669	0.44579	1	0.591441	-2.315	0.000244681	0.485494	-2.56533	0.000835823	0.540656	-2.32545	1	1.1571	-1.30252	0.247872
ENSG00000100867	DHRS2	0.0119145	-2.61821	3.06567e-05	0.0551659	-0.31426	0.714725	0.0190213	-1.92293	0.00772497	0.128269	1.18811	0.0117306	0.0919289	0.57382	0.572126	0.0455387	-0.536685	1	0.0754675	0.22607	1	0.0916331	0.526743	0.463852	0.0463419	-0.30195	1	39.3414	8.66613	0.000682356
ENSG00000066279	ASPM	0.279617	-1.96685	3.41913e-05	1.3517	0.631969	0.110315	2.07253	1.38104	0.000211031	0.956416	-0.0292108	1	0.915148	-0.102176	1	1.21224	0.339367	1	0.184476	-2.51873	7.27304e-05	0.233905	-2.13192	0.00676398	0.162197	-2.53789	1	0	-1.40932	1
ENSG00000161800	RACGAP1	0.189887	-1.96361	3.41913e-05	0.767355	0.281725	0.54518	1.32872	1.26764	0.000966545	0.928188	0.584794	0.294354	0.601265	-0.153683	1	0.784177	0.266683	1	0.171619	-2.05181	0.00176529	0.223456	-1.62714	0.0461075	0.200815	-1.68046	1	0.578549	0.151352	0.246603
ENSG00000148773	MKI67	0.67205	-1.93149	4.02882e-05	3.1021	0.587136	0.141761	5.15556	1.50258	2.18646e-05	2.27979	-0.00309685	1	1.93216	-0.275104	0.879669	2.71502	0.266527	1	0.490818	-2.33621	0.000214556	0.499159	-2.27336	0.00321098	0.455696	-2.32029	1	1.73565	-0.639415	0.246603
ENSG00000146670	CDCA5	0.162707	-1.93836	4.45081e-05	0.70147	0.439049	0.302815	1.11829	1.26472	0.000993682	0.718557	0.435441	0.501773	0.497327	-0.184425	0.978531	0.738638	0.440264	1	0.110127	-2.45171	0.000113079	0.139861	-2.06228	0.00913216	0.123578	-2.10216	1	4.62839	2.56888	0.246603
ENSG00000117650	NEK2	0.0834012	-1.972	4.54985e-05	0.49963	1.07815	0.00164174	0.491383	0.919068	0.0663077	0.221254	-0.451877	0.654258	0.306015	0.0785275	0.978531	0.350648	0.284231	1	0.0855298	-1.87151	0.00738736	0.0771647	-1.98337	0.0144419	0.0386183	-2.67665	1	4.62839	3.49885	0.246603
ENSG00000108691	CCL2	0.115794	-2.5996	4.54985e-05	0.176479	-2.05542	0.000118416	0.0661783	-3.40668	8.98247e-07	1.51225	1.65727	9.01268e-05	0.270817	-1.30494	0.310961	0.134795	-2.2563	1	0.679766	0.157145	1	3.40971	3.05234	2.49631e-11	0.911391	0.569586	1	0	-0.750826	1
ENSG00000171848	RRM2	0.793428	-1.90981	4.59676e-05	4.16882	0.887531	0.0121439	4.19737	0.801104	0.154824	2.62682	-0.0195719	1	2.79638	0.0848466	0.965316	3.19044	0.281664	1	0.935238	-1.60545	0.0258302	0.704128	-1.99171	0.0111152	2.58742	-0.0455384	1	9.83534	1.31223	0.246603
ENSG00000213347	MXD3	0.103507	-1.93716	5.49086e-05	0.499108	0.663205	0.0916499	0.773136	1.43356	9.82698e-05	0.382317	0.129498	0.902695	0.296077	-0.292485	0.865411	0.322414	-0.140622	1	0.0732314	-2.38349	0.000224943	0.110924	-1.73641	0.0337852	0.115855	-1.53664	1	1.73565	2.05038	0.246603
ENSG00000143320	CRABP2	4.39159	1.37536	5.56708e-05	1.21234	-0.941238	0.0337382	2.41531	0.243222	0.921117	0.784145	-1.54784	0.00216036	1.31392	-0.75165	0.490878	2.9673	0.542594	1	2.21763	0.0929314	1	2.04888	-0.0330969	1	3.8541	0.881819	1	30.6631	3.24355	0.246603
ENSG00000109805	NCAPG	0.0640402	-1.93223	7.01134e-05	0.322629	0.756882	0.046128	0.372104	0.940587	0.0551877	0.24284	0.176728	0.843575	0.224853	0.0475369	1	0.257749	0.256755	1	0.062051	-1.91497	0.00572234	0.0618925	-1.87867	0.0216253	0.139026	-0.591173	1	1.1571	2.32975	0.246603
ENSG00000182481	KPNA2	0.545831	-1.86164	8.76847e-05	3.13557	1.15685	0.000413275	2.10423	0.29295	0.867855	1.85638	0.0782756	0.962278	1.82119	0.046268	1	1.62573	-0.131661	1	0.988903	-0.90887	0.499953	0.642235	-1.52905	0.0628014	0.764642	-1.21426	1	1.1571	-0.687803	0.246603
ENSG00000077152	UBE2T	0.539502	-1.84708	9.30688e-05	3.55729	1.5133	6.17108e-07	1.60849	-0.125197	1	1.35783	-0.399958	0.709189	2.521	0.644128	0.415354	0.888916	-1.00828	1	0.812813	-1.17432	0.211211	0.306247	-2.58353	0.00073496	0.996351	-0.80356	1	2.3142	0.0799691	0.246603
ENSG00000198826	ARHGAP11A	0.297489	-1.84143	0.000107761	1.07351	0.221468	0.65793	1.91877	1.26776	0.00096113	1.2636	0.480864	0.4372	0.952002	-0.00167036	1	1.32518	0.512161	1	0.206837	-2.31956	0.000252265	0.254	-1.98018	0.0123417	0.270328	-1.7956	1	1.1571	0.206394	0.246603
ENSG00000128944	KNSTRN	0.239406	-1.83485	0.000120679	1.43196	1.29126	4.78559e-05	1.00218	0.466622	0.688777	0.759238	-0.00978215	1	0.804171	0.0862156	0.965005	0.618416	-0.321419	1	0.277832	-1.55409	0.0363535	0.169602	-2.24584	0.00394231	0.254881	-1.55831	1	0	-1.0595	1
ENSG00000013810	TACC3	0.188397	-1.83327	0.000127889	0.779643	0.496163	0.235501	1.1813	1.22096	0.00183758	0.667083	0.176232	0.839484	0.568965	-0.0894673	1	0.76414	0.373193	1	0.173296	-1.89778	0.00515923	0.213007	-1.55848	0.0584702	0.139026	-2.0523	1	1.1571	0.872335	0.246603
ENSG00000115163	CENPA	0.387965	-1.79474	0.000180939	1.6236	0.57121	0.157664	2.42284	1.26537	0.000978698	1.4641	0.329542	0.63818	1.14994	-0.0772773	1	1.25414	0.0615461	1	0.294044	-2.14743	0.000887413	0.181659	-2.81179	0.00027144	0.223986	-2.39784	1	1.1571	-0.131835	0.246603
ENSG00000138180	CEP55	0.371582	-1.72998	0.000340798	1.43876	0.50102	0.228667	2.21162	1.25455	0.00110565	1.35783	0.347571	0.611466	1.00252	-0.161836	1	1.33702	0.293369	1	0.266652	-2.16486	0.000766692	0.205772	-2.50539	0.00116427	0.455696	-1.27172	1	0.578549	-0.593074	0.248526
ENSG00000133119	RFC3	0.237172	-1.72506	0.000364989	0.944879	0.563601	0.163048	0.798894	0.214824	0.940175	0.795768	0.206488	0.800339	1.17271	0.892398	0.157414	1.03828	0.605787	1	0.186153	-2.02697	0.00197919	0.197734	-1.90146	0.016947	0.131302	-2.35937	1	0.578549	0.058612	0.246603
ENSG00000189001	SBSN	0.308287	-1.72822	0.000394265	0.838731	-0.16013	0.879664	0.215971	-2.25134	1.04958e-05	2.25903	1.66827	2.58729e-07	0.834814	-0.154098	1	0.342451	-1.47476	1	1.40817	0.706845	0.408964	1.23544	0.468186	0.43766	1.01952	0.154732	1	1.73565	0.677918	0.246603
ENSG00000134057	CCNB1	0.590883	-1.72049	0.000418805	4.02842	1.82575	5.88802e-10	1.83595	0.0836755	1	1.10295	-0.742563	0.33144	1.55824	-0.188608	0.976997	1.15759	-0.62467	1	0.96263	-0.928733	0.486607	0.396273	-2.21821	0.00475924	0.88822	-0.979291	1	0.578549	-1.25276	0.255256
ENSG00000122861	PLAU	1.24469	-1.7074	0.000446842	2.71306	-0.522427	0.312111	2.1292	-0.870528	0.362639	8.81239	1.62574	6.13414e-07	2.5856	-0.559542	0.617431	2.11209	-0.827196	1	3.40666	-0.109111	1	8.74051	1.41693	0.00270124	1.74555	-1.07299	1	0	-3.31477	1
ENSG00000166801	FAM111A	0.288926	-1.69344	0.000477515	1.05573	0.433595	0.308975	1.60017	1.15906	0.00402919	0.908678	0.132609	0.899471	0.836884	-0.0051103	1	1.13574	0.469052	1	0.252676	-1.83632	0.00707582	0.337595	-1.37421	0.101647	0.223986	-1.87593	1	1.1571	0.389296	0.246603
ENSG00000129355	CDKN2D	0.311265	-1.68098	0.000556418	1.08659	0.360646	0.418609	1.71667	1.16708	0.00377436	1.28186	0.613173	0.261156	0.711414	-0.379291	0.780545	0.882541	-0.0247067	1	0.320877	-1.5794	0.0319478	0.418779	-1.15286	0.191611	0.339841	-1.3853	1	8.67824	2.70999	0.246603
ENSG00000113810	SMC4	1.03991	-1.59668	0.00110587	4.66243	0.992011	0.00352982	3.81377	0.511559	0.618946	2.84559	0.00693117	1	3.14339	0.174033	0.863934	2.87167	0.0199218	1	1.20804	-1.31776	0.111891	0.904274	-1.71807	0.0312879	1.46749	-0.957549	1	7.52114	0.857114	0.246603
ENSG00000074370	ATP2A3	0.00186163	-2.66095	0.00121154	0.0036603	-1.89867	0.00345687	0.00158511	-2.82559	0.0019976	0.0415111	2.42048	1.90272e-09	0.00745369	-0.730854	0.637249	0.00546465	-1.00091	1	0.00838527	-0.510623	1	0.0458165	2.24368	5.27496e-05	0	-0.693459	1	1.73565	6.9158	0.0630922
ENSG00000123975	CKS2	4.08666	-1.57985	0.00128477	15.8368	0.704347	0.0623712	16.7265	0.729579	0.251449	12.1661	0.167116	0.84906	14.0796	0.417654	0.609823	10.4074	-0.0872899	1	3.99195	-1.56144	0.032938	2.88885	-2.00721	0.0103337	1.93091	-2.52516	1	5.78549	-1.44929	0.246603
ENSG00000061656	SPAG4	1.13448	1.17724	0.00152996	0.320276	-1.06201	0.0146667	0.634439	0.107233	1	0.426319	-0.542706	0.542441	0.149074	-2.1519	0.000222818	0.31695	-0.949746	1	0.85977	0.602044	0.574643	1.25151	1.19363	0.017695	0.664234	0.164522	1	0	-0.700246	1
ENSG00000103490	PYCARD	0.0040956	-2.32322	0.00177211	0.00915074	-1.2547	0.0402308	0.00317022	-2.64575	0.00112399	0.0660026	2.40465	3.96798e-10	0.0144933	-0.455806	0.808928	0.0072862	-1.31974	1	0.00894429	-1.13211	0.590951	0.0626963	1.94558	0.000483367	0.023171	0.643916	1	1.1571	5.81452	0.177642
ENSG00000181617	FDCSP	0.230843	-1.70955	0.00191233	1.12685	1.0138	0.00675914	0.635232	-0.108574	1	0.655045	-0.0570967	1	0.706858	0.069602	0.986788	0.233158	-1.59568	1	0.845795	0.358566	0.968042	0.517646	-0.413406	0.845285	0.432525	-0.638042	1	0	-0.887801	1
ENSG00000170540	ARL6IP1	1.53622	-1.54546	0.00191619	6.8424	1.05223	0.00185752	5.49834	0.528012	0.594358	4.19262	0.058622	0.99002	3.99684	-0.021093	1	2.89171	-0.512023	1	2.31434	-0.872738	0.541288	1.56339	-1.43634	0.0835548	1.03497	-1.97526	1	7.52114	0.342616	0.246603
ENSG00000006634	DBF4	0.309404	-1.54816	0.00194019	1.08162	0.534975	0.193151	1.56688	1.17066	0.0034919	0.779994	-0.077139	1	0.855932	0.0774144	0.976771	1.09931	0.460155	1	0.240378	-1.87032	0.00554213	0.227475	-1.91586	0.015842	0.154473	-2.35248	1	0	-1.15703	1
ENSG00000007372	PAX6	0.0826566	-1.56634	0.00221651	0.275568	0.412471	0.344246	0.320984	0.644266	0.412243	0.274803	0.365977	0.592106	0.248456	0.193827	0.850071	0.226783	0.0398653	1	0.115717	-1.00494	0.408964	0.164779	-0.448716	0.759396	0.0308946	-2.54074	1	1.1571	2.3113	0.246603
ENSG00000138587	MNS1	0.232332	-1.52359	0.00249223	0.829057	0.608164	0.128257	0.741038	0.34886	0.821317	0.625987	0.0597375	0.989891	0.957385	0.800267	0.248486	0.724066	0.28043	1	0.223048	-1.53101	0.0413953	0.179247	-1.82046	0.0229398	0.324393	-0.878997	1	1.1571	0.864139	0.246603
ENSG00000163879	DNALI1	0.0096805	-1.83659	0.00249658	0.0264064	-0.329657	0.645667	0.00752926	-2.18266	0.000759299	0.0772106	1.62962	1.02582e-05	0.0376826	0.290569	0.791842	0.00910775	-1.74211	1	0.0463985	0.625032	0.685536	0.0490317	0.695343	0.301589	0	-2.07247	1	1.1571	5.1072	0.246603
ENSG00000169583	CLIC3	0.121006	1.22354	0.0026999	0.0318969	-1.12867	0.020273	0.0495346	-0.36412	0.936888	0.011208	-2.59115	4.0102e-06	0.0480349	-0.410504	0.784677	0.0400741	-0.635683	1	0.138637	1.3701	0.00523894	0.0779685	0.367019	0.590693	0.139026	1.24032	1	2.3142	4.88595	0.21156
ENSG00000151725	CENPU	0.258767	-1.486	0.00352176	1.12057	1.07406	0.00143328	0.883698	0.512187	0.622134	0.503945	-0.43124	0.671001	0.792162	0.31796	0.713717	0.733174	0.170946	1	0.283422	-1.29673	0.129477	0.13745	-2.33017	0.00265118	0.517485	-0.335015	1	3.4713	1.96718	0.246603
ENSG00000105509	HAS1	0.0659018	-1.60005	0.00393553	0.110332	-0.852961	0.0873822	0.0542899	-1.88076	0.00112399	0.368619	1.27863	0.000797517	0.105594	-0.86059	0.460725	0.0865236	-1.09747	1	0.337647	1.04636	0.0748527	0.553014	1.85092	6.11537e-05	0.0386183	-1.98355	1	2.89275	3.60617	0.246603
ENSG00000188486	H2AFX	0.339934	-1.45546	0.00454459	1.16711	0.62097	0.115864	1.59858	1.14427	0.00476735	1.0631	0.389398	0.551568	0.629423	-0.480146	0.684834	0.753211	-0.175603	1	0.295162	-1.61491	0.02575	0.325538	-1.43773	0.0835548	0.463419	-0.858628	1	0	-1.20531	1
ENSG00000132646	PCNA	0.513811	-1.45157	0.00456982	2.5426	1.44445	1.97238e-06	1.20864	-0.0874698	1	1.00166	-0.392983	0.719888	1.39218	0.149079	0.89489	0.872522	-0.574461	1	0.881572	-0.578485	0.904702	0.416368	-1.68121	0.0367748	0.648787	-0.972201	1	6.36404	1.78852	0.246603
ENSG00000105011	ASF1B	0.336956	-1.43654	0.00536172	1.29574	0.884011	0.0129269	1.27799	0.760216	0.210422	0.998342	0.317438	0.653597	0.753651	-0.154083	1	0.755943	-0.137853	1	0.260503	-1.76935	0.0105946	0.249178	-1.80035	0.0240658	0.548379	-0.587788	1	2.3142	1.14747	0.246603
ENSG00000117399	CDC20	0.559607	-1.43403	0.00587496	2.83804	1.53548	4.87512e-07	1.68537	0.351794	0.819015	1.23329	-0.175196	0.98303	1.09238	-0.372513	0.787402	0.839734	-0.742884	1	0.695419	-1.05506	0.335942	0.26445	-2.45461	0.00158349	0.772365	-0.829431	1	19.0921	3.18564	0.246603
ENSG00000151651	ADAM8	0.44158	1.08926	0.00673555	0.13883	-0.957303	0.0354097	0.431546	1.02825	0.0235734	0.0855129	-1.63275	0.00161504	0.0674973	-1.98751	0.00111095	0.179423	-0.451473	1	0.219135	-0.157222	1	0.479064	1.09244	0.0379492	0.216262	-0.125683	1	1.1571	2.18245	0.246603
ENSG00000129195	FAM64A	0.246108	-1.42007	0.00687172	0.873242	0.735574	0.051307	1.12939	1.1409	0.00521053	0.593609	-0.0120857	1	0.523415	-0.219286	0.942775	0.625702	0.0702118	1	0.219694	-1.53866	0.0413953	0.123785	-2.3463	0.0026503	0.270328	-1.12178	1	13.3066	3.88138	0.246603
ENSG00000176171	BNIP3	19.6082	1.06065	0.00688709	7.404	-0.678681	0.156386	12.5338	0.234728	0.921166	7.08179	-0.69966	0.365989	4.84821	-1.28895	0.0972475	7.50843	-0.56901	1	15.2791	0.549776	0.665053	15.5278	0.553763	0.344599	11.0912	0.0137606	1	0.578549	-3.89587	0.328344
ENSG00000100234	TIMP3	1.82477	1.07008	0.00745218	0.563686	-1.00335	0.0238971	1.0327	0.0362294	1	0.33541	-1.73079	0.000524123	0.390905	-1.49944	0.0378548	0.689457	-0.580423	1	1.85259	1.01193	0.0674891	2.20884	1.25932	0.0113261	0.594721	-0.761738	1	1.1571	0.121622	0.246603
ENSG00000185338	SOCS1	0.682103	1.06908	0.00748396	0.182492	-1.23613	0.00352982	0.42045	0.180487	0.964046	0.46866	0.364582	0.591315	0.16895	-1.27686	0.114437	0.371596	-0.0242785	1	0.365039	-0.0546237	1	0.520862	0.504062	0.401339	0.0772365	-2.17312	1	1.73565	1.95569	0.246603
ENSG00000092853	CLSPN	0.957252	-1.35649	0.0107735	3.2493	0.731217	0.0507727	2.55044	0.227466	0.925885	1.81985	-0.333451	0.790846	3.93762	1.00075	0.078265	2.85255	0.380728	1	0.688152	-1.80104	0.00829964	0.491121	-2.26217	0.00333819	0.795536	-1.49072	1	0	-2.60512	1
ENSG00000112029	FBXO5	0.377539	-1.36054	0.0109228	1.15927	0.520538	0.208109	1.61324	1.07818	0.0105885	0.981322	0.178646	0.83517	0.866699	-0.0294306	1	1.06105	0.285181	1	0.257707	-1.88083	0.00526437	0.293387	-1.65485	0.0415557	0.139026	-2.60762	1	0.578549	-0.26736	0.246834
ENSG00000157456	CCNB2	0.450515	-1.35971	0.0110951	2.10885	1.45466	1.89918e-06	1.06836	0.0258158	1	0.930679	-0.202069	0.945834	1.02737	-0.0394319	1	0.727709	-0.559657	1	0.654051	-0.743846	0.721423	0.239532	-2.21109	0.00455205	0.756918	-0.474331	1	1.73565	0.478825	0.246603
ENSG00000023608	SNAPC1	0.831778	-1.37052	0.0123741	3.06001	0.882273	0.0152331	1.56331	-0.369073	0.919344	1.14778	-0.857226	0.223485	2.80797	0.621845	0.454998	1.64304	-0.266354	1	2.63242	0.484249	0.782778	1.10201	-0.873073	0.374311	0.841878	-1.21956	1	5.78549	1.04419	0.246603
ENSG00000120802	TMPO	0.34887	-1.34312	0.0125772	0.886315	0.175767	0.739647	1.52368	1.14262	0.00485318	0.992115	0.351457	0.60471	0.865871	0.119764	0.932419	1.16215	0.569219	1	0.18783	-2.21448	0.000549041	0.24114	-1.81018	0.0233068	0.31667	-1.33066	1	0.578549	-0.137211	0.246603
ENSG00000175602	CCDC85B	11.6844	1.01482	0.0126998	3.54578	-1.07866	0.0113764	6.36223	-0.075756	1	6.78706	0.032099	1	2.40713	-1.60266	0.0151098	4.90179	-0.466606	1	8.7369	0.442133	0.835052	12.5545	1.01199	0.0522654	6.19437	-0.11362	1	6.36404	-0.597687	0.246603
ENSG00000156802	ATAD2	0.709655	-1.33328	0.0132126	2.01264	0.399355	0.353325	2.70182	0.892651	0.0731834	1.59361	-0.0362388	1	2.14708	0.470893	0.575011	2.29333	0.531619	1	0.479079	-1.8718	0.00526437	0.49514	-1.78867	0.024737	0.532932	-1.60886	1	2.3142	0.17032	0.246603
ENSG00000168476	REEP4	0.238661	-1.34066	0.0134412	0.93416	1.05924	0.00178441	0.781062	0.604944	0.476056	0.536323	-0.0438552	1	0.488217	-0.19851	0.962647	0.44628	-0.319636	1	0.315286	-0.869281	0.551031	0.185678	-1.63262	0.045286	0.278052	-0.963007	1	2.3142	1.73455	0.246603
ENSG00000100749	VRK1	0.275522	-1.30881	0.0167577	1.00423	0.947385	0.00626581	0.704977	0.210154	0.941993	0.625157	0.00662363	1	0.708515	0.217108	0.821568	0.624792	0.00567096	1	0.367834	-0.821631	0.616892	0.254	-1.3522	0.108827	0.370735	-0.733947	1	0	-0.765086	1
ENSG00000176890	TYMS	1.02315	-1.29621	0.0170001	4.43288	1.36629	9.5959e-06	2.89401	0.398806	0.76735	1.44874	-0.741102	0.320737	2.1947	-0.0722299	1	1.97365	-0.229195	1	1.37519	-0.799002	0.647353	0.600438	-2.00812	0.0102688	2.72645	0.245425	1	4.62839	0.525428	0.246603
ENSG00000154640	BTG3	0.745771	-1.28647	0.0184696	2.78209	1.03217	0.00227973	1.84269	0.176007	0.965001	1.33334	-0.35944	0.756407	1.90566	0.231753	0.80497	1.37072	-0.292981	1	1.34388	-0.335023	1	0.706539	-1.29193	0.127796	1.36709	-0.285118	1	6.94259	1.52137	0.246603
ENSG00000149506	ZP1	0.796407	0.992039	0.0190837	0.17491	-1.61162	7.45425e-05	0.483062	0.0861254	1	0.442923	-0.0588875	1	0.0981403	-2.38516	3.93909e-05	0.243177	-0.95594	1	0.547838	0.286361	1	1.35762	1.78853	4.8931e-05	0.393906	-0.205617	1	0.578549	0.674967	0.246603
ENSG00000040275	SPDL1	0.335466	-1.28486	0.0197201	0.859385	0.262866	0.57816	1.26412	0.931529	0.0524188	0.714821	-0.0716248	1	0.90024	0.316712	0.713842	1.22772	0.778848	1	0.228638	-1.80996	0.00827521	0.380197	-1.02272	0.262734	0.154473	-2.22166	1	1.1571	0.558783	0.246603
ENSG00000099194	SCD	4.17341	0.981431	0.0197823	0.75742	-1.91819	1.34878e-06	2.47277	0.0369202	1	2.57161	0.102266	0.931601	0.438111	-2.63506	1.60384e-06	1.49549	-0.72901	1	2.5726	0.0987262	1	7.88285	1.96643	3.00496e-06	1.35164	-0.846855	1	0	-2.72234	1
ENSG00000167325	RRM1	0.60168	-1.27601	0.0201062	1.41418	0.112231	0.858196	1.77532	0.495952	0.637578	1.54878	0.255575	0.736711	1.81953	0.53512	0.520341	2.30244	0.859958	1	0.562372	-1.33032	0.106147	0.67921	-1.02075	0.261875	0.787813	-0.757407	1	0	-1.8603	1
ENSG00000170421	KRT8	1.19145	0.97876	0.0201079	0.406031	-0.918757	0.0388136	0.7557	0.150072	0.985936	0.487755	-0.566716	0.510414	0.465856	-0.639816	0.570081	0.785088	0.196105	1	0.718898	0.0626168	1	1.07227	0.692537	0.22847	0.671958	-0.0362905	1	0.578549	0.0840623	0.246603
ENSG00000123219	CENPK	0.672422	-1.27197	0.0205648	1.99042	0.562769	0.161538	2.1399	0.635907	0.405058	1.39104	-0.106261	1	2.10194	0.598484	0.464391	1.89441	0.378581	1	0.514297	-1.62685	0.0226571	0.412349	-1.91981	0.0147178	0.880497	-0.754914	1	0.578549	-1.01676	0.254022
